# Supplementary material
Source: MDPI journal article supplement (https://www.mdpi.com/2073-4352/12/10/1386)

## Supplementary Material

# Bis-citrullinato copper(II) complex: Synthesis, crystal structure, and non-covalent interactions

Diego Ramírez-Contreras <sup>1</sup>, Amalia García-García <sup>1,5</sup>, Brenda L. Sánchez-Gaytán <sup>1</sup>, Laura E. Serrano-de la Rosa <sup>2</sup>, Francisco J. Melendez <sup>3</sup>, Duane Choquesillo-Lazarte <sup>4</sup>, Antonio Rodríguez-Diéguez <sup>5</sup>, María Eugenia Castro <sup>1,\*</sup> and Enrique González-Vergara <sup>1,\*</sup>

<sup>1</sup> Centro de Química del Instituto de Ciencias, Benemérita Universidad Autónoma de Puebla, 18 sur y Av. San Claudio, Col. San Manuel, C. P. 72570 Puebla, Mexico

<sup>2</sup> Laboratorio Central del Instituto de Física "Luis Rivera Terrazas" (IFUAP), Benemérita Universidad Autónoma de Puebla, 18 sur y Av. San Claudio, Col. San Manuel, C. P. 72570 Puebla, Mexico.

<sup>3</sup> Facultad de Ciencias Químicas, Benemérita Universidad Autónoma de Puebla, 22 sur y Av. San Claudio, Col. San Manuel, C. P. 72570 Puebla, Mexico

<sup>4</sup> Laboratorio de Estudios Cristalográficos, IACT, CSIC-UGR, Av. Las Palmeras nº4, 18100 Granada, Spain

<sup>5</sup> Departamento de Química Inorgánica, Facultad de Ciencias, Universidad de Granada, Av. Fuentenueva S/N, 18071 Granada, Spain

\* Correspondence: mareug.castro@correo.buap.mx (M.E.C.), enrique.gonzalez@correo.buap.mx (E.G.-V.); Tel.: +52-2223630623

$$\text{Equations: } \delta_{FC} = \frac{\mu_0 \mu_B^2 g_e^2 (S+1)}{9kT} \rho_{\alpha\beta} \cong m \frac{S+1}{T} \rho_{\alpha\beta} \quad (\text{S1a})$$

$$\text{where: } m = \frac{\mu_0 \mu_B^2 g_e^2 (S+1)}{9kT} = 2.35 \times 10^7 \text{ ppm K au}^{-1}$$

$$\delta_{Total}^{Calc.} = \delta_{FC} + \delta_0 \quad (\text{S1b})$$

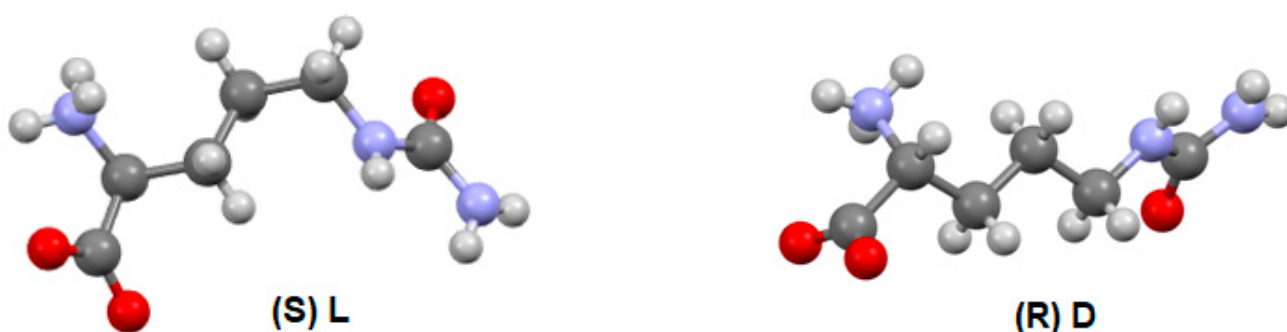

**Figure S1.** Stereoisomers (S) L-Citrulline (FIFGOQ) and (R) D-Citrulline (EYIKUU)

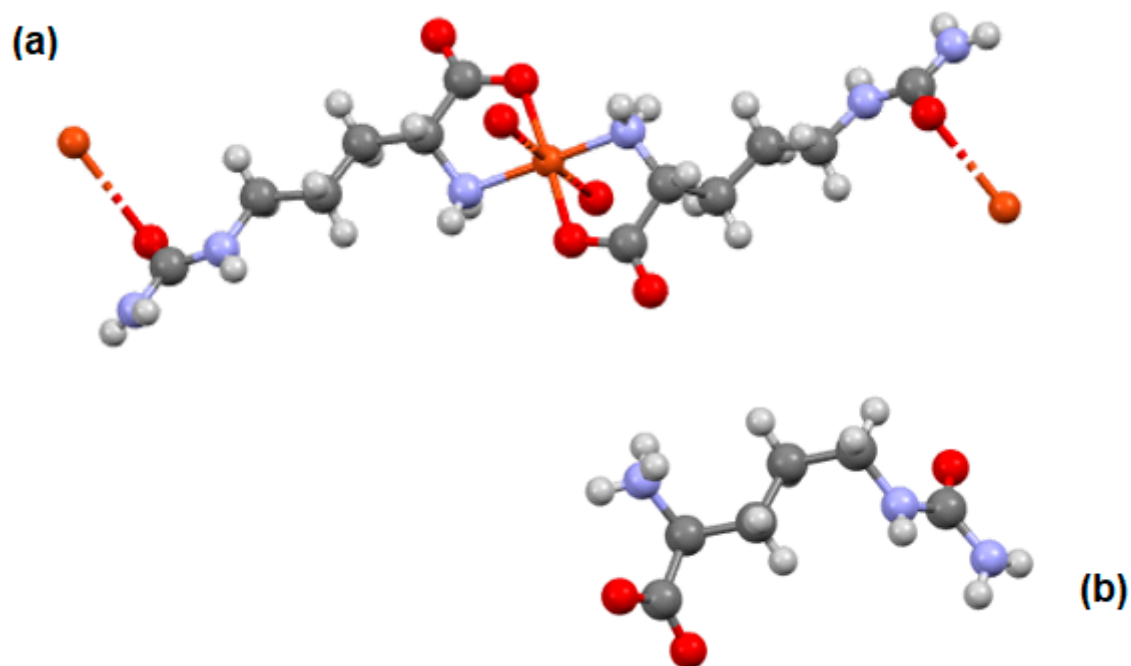

**Figure S2.** (a) The structure of the complex (R) and (b) the structure of the zwitter ion of L-Citrulline from CCDC(FIGOQ)(S).

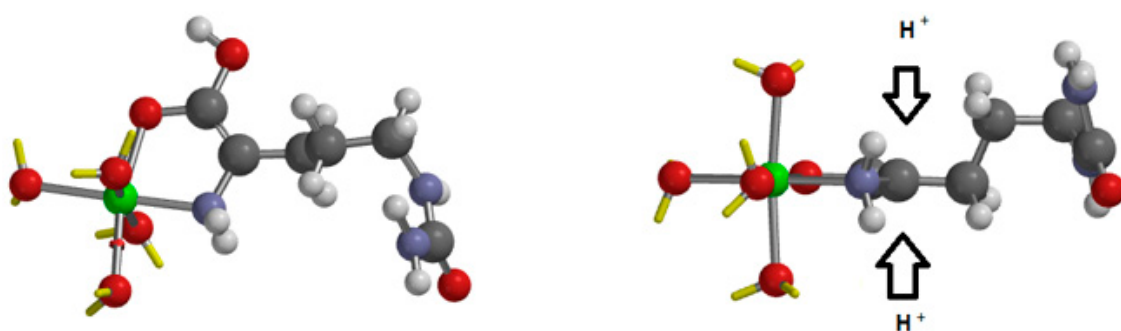

**Figure S3.** Top and side views of the intermediary of the racemization of Citrulline mediated by copper coordination

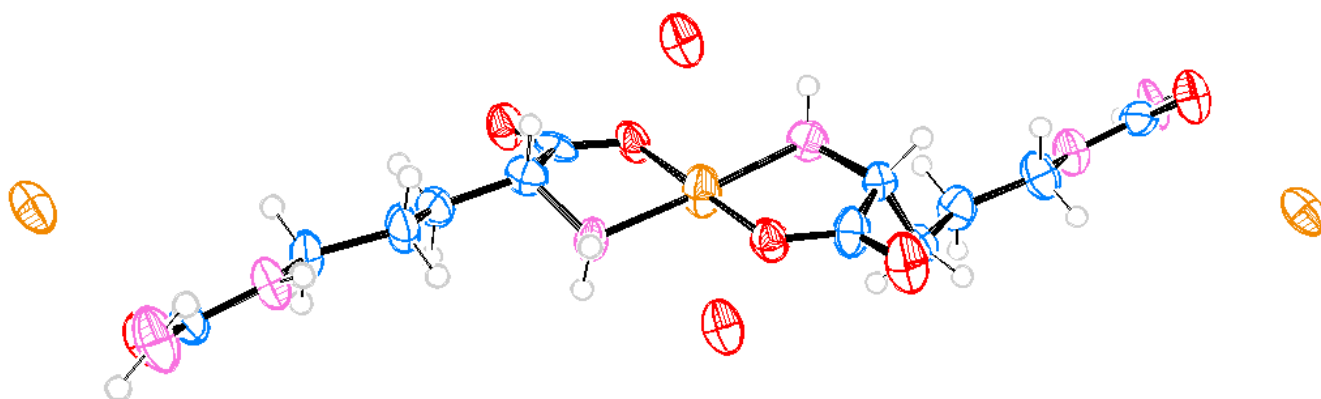

**Figure S4.** ORTEP representation of a fragment of the bis-citrullinato Cu(II) polymer.

**Table S1.** Fractional atomic coordinates and isotropic or equivalent isotropic displacement parameters ( $\text{\AA}^2$ ) for (Cu\_citrulline)

|     | <i>x</i>     | <i>y</i>    | <i>z</i>     | $U_{\text{iso}}^*/U_{\text{eq}}$ |
|-----|--------------|-------------|--------------|----------------------------------|
| Cu1 | 0.2150 (4)   | 0.5043 (3)  | 0.25290 (10) | 0.0487 (6)                       |
| O1  | 0.0266 (17)  | 0.6868 (9)  | 0.2266 (4)   | 0.039 (2)                        |
| N1  | 0.459 (2)    | 0.5751 (11) | 0.1755 (5)   | 0.033 (2)                        |
| H1A | 0.585048     | 0.629340    | 0.198898     | 0.039*                           |
| H1B | 0.531339     | 0.500935    | 0.151659     | 0.039*                           |
| C1  | 0.1040 (19)  | 0.7497 (15) | 0.1663 (7)   | 0.035 (3)                        |
| O2  | 0.0257 (19)  | 0.8704 (10) | 0.1443 (5)   | 0.045 (2)                        |
| N2  | 0.914 (2)    | 0.6746 (12) | −0.0937 (5)  | 0.041 (2)                        |
| H2  | 0.907157     | 0.581383    | −0.092429    | 0.049*                           |
| C2  | 0.291 (2)    | 0.6637 (14) | 0.1181 (6)   | 0.036 (3)                        |
| H2A | 0.184777     | 0.595489    | 0.085433     | 0.043*                           |
| O3  | 1.107 (2)    | 0.8719 (9)  | −0.1413 (5)  | 0.045 (2)                        |
| N3  | 1.205 (2)    | 0.6487 (13) | −0.1865 (6)  | 0.053 (3)                        |
| H3A | 1.357824     | 0.684189    | −0.196377    | 0.064*                           |
| H3B | 1.122875     | 0.565968    | −0.191756    | 0.064*                           |
| C3  | 0.446 (2)    | 0.7555 (14) | 0.0631 (6)   | 0.039 (3)                        |
| H3C | 0.325507     | 0.814750    | 0.030548     | 0.047*                           |
| H3D | 0.560981     | 0.820326    | 0.094008     | 0.047*                           |
| O4  | 0.4012 (16)  | 0.3233 (9)  | 0.2733 (4)   | 0.0355 (18)                      |
| N4  | −0.0321 (19) | 0.4282 (12) | 0.3250 (5)   | 0.038 (2)                        |
| H4A | −0.074792    | 0.497998    | 0.357736     | 0.045*                           |
| H4B | −0.177338    | 0.399005    | 0.298006     | 0.045*                           |
| C4  | 0.606 (2)    | 0.6651 (15) | 0.0113 (6)   | 0.042 (3)                        |
| H4C | 0.493993     | 0.596373    | −0.017838    | 0.050*                           |
| H4D | 0.735731     | 0.610634    | 0.043253     | 0.050*                           |
| O5  | 0.423 (2)    | 0.1341 (10) | 0.3523 (6)   | 0.053 (3)                        |
| N5  | −0.332 (2)   | 0.3433 (12) | 0.6015 (5)   | 0.042 (3)                        |

|     |            |             |             |           |
|-----|------------|-------------|-------------|-----------|
| H5  | −0.329297  | 0.436036    | 0.607388    | 0.051*    |
| C5  | 0.743 (2)  | 0.7614 (13) | −0.0457 (6) | 0.036 (3) |
| H5A | 0.613438   | 0.811466    | −0.079768   | 0.043*    |
| H5B | 0.846993   | 0.834041    | −0.016644   | 0.043*    |
| O6  | −0.516 (2) | 0.1314 (10) | 0.6374 (5)  | 0.051 (3) |
| N6  | −0.629 (2) | 0.3429 (11) | 0.6917 (6)  | 0.046 (3) |
| H6A | −0.616713  | 0.435858    | 0.695359    | 0.055*    |
| H6B | −0.733709  | 0.296467    | 0.719910    | 0.055*    |
| C6  | 1.079 (2)  | 0.7398 (13) | −0.1389 (6) | 0.034 (3) |
| C7  | 0.321 (3)  | 0.2475 (14) | 0.3300 (6)  | 0.037 (3) |
| C8  | 0.084 (2)  | 0.3063 (14) | 0.3696 (6)  | 0.034 (3) |
| H8  | −0.045775  | 0.229003    | 0.373275    | 0.041*    |
| C9  | 0.182 (2)  | 0.3560 (15) | 0.4525 (6)  | 0.039 (3) |
| H9A | 0.279879   | 0.276577    | 0.477763    | 0.047*    |

|      |            |             |            |           |
|------|------------|-------------|------------|-----------|
| H9B  | 0.303604   | 0.435713    | 0.447359   | 0.047*    |
| C10  | −0.024 (3) | 0.4044 (14) | 0.5064 (6) | 0.044 (3) |
| H10A | 0.058403   | 0.467785    | 0.546110   | 0.052*    |
| H10B | −0.153540  | 0.461607    | 0.475956   | 0.052*    |
| C11  | −0.161 (3) | 0.2876 (15) | 0.5462 (7) | 0.045 (3) |
| H11A | −0.261681  | 0.230233    | 0.507291   | 0.054*    |
| H11B | −0.032892  | 0.224261    | 0.572985   | 0.054*    |
| C12  | −0.491 (2) | 0.2736 (15) | 0.6444 (6) | 0.038 (3) |

**Table S2.** Atomic displacement parameters ( $\text{\AA}^2$ ) for (Cu\_citrulline)

|     | $U^{11}$    | $U^{22}$   | $U^{33}$   | $U^{12}$    | $U^{13}$   | $U^{23}$   |
|-----|-------------|------------|------------|-------------|------------|------------|
| Cu1 | 0.0510 (10) | 0.0474 (9) | 0.0501 (8) | 0.0140 (11) | 0.0206 (9) | 0.0099 (8) |
| O1  | 0.027 (4)   | 0.042 (5)  | 0.048 (4)  | 0.005 (4)   | 0.016 (4)  | 0.013 (4)  |
| N1  | 0.038 (5)   | 0.028 (5)  | 0.033 (4)  | 0.009 (4)   | 0.009 (4)  | 0.007 (3)  |
| C1  | 0.012 (5)   | 0.041 (8)  | 0.051 (6)  | 0.002 (5)   | 0.008 (5)  | −0.006 (5) |
| O2  | 0.044 (5)   | 0.039 (5)  | 0.055 (5)  | 0.008 (5)   | 0.016 (4)  | 0.011 (4)  |
| N2  | 0.045 (6)   | 0.036 (6)  | 0.044 (5)  | −0.007 (5)  | 0.018 (5)  | 0.003 (4)  |
| C2  | 0.033 (6)   | 0.039 (7)  | 0.038 (5)  | 0.003 (5)   | 0.008 (5)  | −0.005 (5) |
| O3  | 0.048 (6)   | 0.033 (5)  | 0.055 (4)  | −0.004 (5)  | 0.022 (4)  | 0.000 (4)  |
| N3  | 0.061 (8)   | 0.041 (7)  | 0.062 (7)  | 0.004 (6)   | 0.037 (6)  | 0.001 (5)  |
| C3  | 0.031 (6)   | 0.048 (7)  | 0.040 (5)  | 0.003 (6)   | 0.009 (5)  | 0.006 (5)  |
| O4  | 0.031 (4)   | 0.036 (4)  | 0.041 (3)  | 0.004 (4)   | 0.012 (3)  | 0.005 (3)  |
| N4  | 0.030 (5)   | 0.045 (6)  | 0.040 (4)  | 0.008 (5)   | 0.011 (4)  | 0.002 (4)  |
| C4  | 0.043 (6)   | 0.046 (7)  | 0.038 (5)  | 0.002 (6)   | 0.016 (5)  | 0.011 (5)  |
| O5  | 0.059 (6)   | 0.038 (5)  | 0.065 (5)  | 0.013 (5)   | 0.031 (5)  | 0.009 (4)  |
| N5  | 0.052 (7)   | 0.031 (5)  | 0.046 (5)  | 0.002 (5)   | 0.015 (5)  | −0.001 (4) |
| C5  | 0.043 (7)   | 0.031 (6)  | 0.035 (5)  | 0.005 (5)   | 0.015 (5)  | 0.008 (5)  |
| O6  | 0.065 (7)   | 0.038 (5)  | 0.052 (5)  | 0.000 (5)   | 0.026 (5)  | 0.004 (4)  |
| N6  | 0.060 (7)   | 0.025 (5)  | 0.057 (6)  | −0.013 (5)  | 0.027 (6)  | 0.004 (4)  |
| C6  | 0.035 (7)   | 0.034 (7)  | 0.033 (5)  | −0.009 (6)  | 0.007 (5)  | −0.001 (4) |
| C7  | 0.053 (8)   | 0.023 (6)  | 0.037 (6)  | 0.006 (5)   | 0.009 (5)  | 0.003 (4)  |
| C8  | 0.034 (6)   | 0.038 (6)  | 0.031 (5)  | −0.005 (5)  | 0.003 (4)  | 0.006 (5)  |
| C9  | 0.034 (6)   | 0.044 (7)  | 0.040 (5)  | −0.002 (6)  | 0.007 (5)  | 0.005 (5)  |
| C10 | 0.048 (7)   | 0.051 (7)  | 0.033 (5)  | 0.005 (6)   | 0.013 (5)  | 0.000 (5)  |
| C11 | 0.051 (8)   | 0.038 (7)  | 0.047 (6)  | −0.003 (6)  | 0.020 (6)  | −0.003 (5) |
| C12 | 0.032 (6)   | 0.048 (8)  | 0.033 (5)  | −0.002 (6)  | 0.002 (5)  | 0.001 (5)  |

**Table S3.** Geometric parameters (Å, °) for (Cu\_citrulline)

|            |            |            |            |
|------------|------------|------------|------------|
| Cu1—O1     | 1.974 (9)  | N4—C8      | 1.461 (16) |
| Cu1—N1     | 1.993 (9)  | C4—H4C     | 0.9700     |
| Cu1—O4     | 1.940 (8)  | C4—H4D     | 0.9700     |
| Cu1—N4     | 1.958 (9)  | C4—C5      | 1.525 (15) |
| O1—C1      | 1.270 (14) | O5—C7      | 1.218 (16) |
| N1—H1A     | 0.8900     | N5—H5      | 0.8600     |
| N1—H1B     | 0.8900     | N5—C11     | 1.429 (15) |
| N1—C2      | 1.502 (15) | N5—C12     | 1.303 (16) |
| C1—O2      | 1.231 (16) | C5—H5A     | 0.9700     |
| C1—C2      | 1.529 (15) | C5—H5B     | 0.9700     |
| N2—H2      | 0.8600     | O6—C12     | 1.320 (17) |
|            |            |            |            |
| N2—C5      | 1.477 (14) | N6—H6A     | 0.8600     |
| N2—C6      | 1.327 (14) | N6—H6B     | 0.8600     |
| C2—H2A     | 0.9800     | N6—C12     | 1.282 (16) |
| C2—C3      | 1.529 (15) | C7—C8      | 1.531 (16) |
| O3—C6      | 1.226 (15) | C8—H8      | 0.9800     |
| N3—H3A     | 0.8740     | C8—C9      | 1.542 (15) |
| N3—H3B     | 0.8730     | C9—H9A     | 0.9700     |
| N3—C6      | 1.364 (16) | C9—H9B     | 0.9700     |
| C3—H3C     | 0.9700     | C9—C10     | 1.518 (17) |
| C3—H3D     | 0.9700     | C10—H10A   | 0.9700     |
| C3—C4      | 1.502 (16) | C10—H10B   | 0.9700     |
| O4—C7      | 1.285 (14) | C10—C11    | 1.476 (18) |
| N4—H4A     | 0.8900     | C11—H11A   | 0.9700     |
| N4—H4B     | 0.8900     | C11—H11B   | 0.9700     |
|            |            |            |            |
| O1—Cu1—N1  | 83.7 (4)   | C5—C4—H4D  | 109.6      |
| O4—Cu1—O1  | 177.2 (3)  | C11—N5—H5  | 115.4      |
| O4—Cu1—N1  | 94.4 (4)   | C12—N5—H5  | 115.4      |
| O4—Cu1—N4  | 84.9 (4)   | C12—N5—C11 | 129.3 (12) |
| N4—Cu1—O1  | 96.9 (4)   | N2—C5—C4   | 111.0(10)  |
| N4—Cu1—N1  | 177.2 (5)  | N2—C5—H5A  | 109.4      |
| C1—O1—Cu1  | 113.4 (7)  | N2—C5—H5B  | 109.4      |
| Cu1—N1—H1A | 110.8      | C4—C5—H5A  | 109.4      |
| Cu1—N1—H1B | 110.8      | C4—C5—H5B  | 109.4      |
| H1A—N1—H1B | 108.9      | H5A—C5—H5B | 108.0      |
| C2—N1—Cu1  | 104.8 (7)  | H6A—N6—H6B | 120.0      |
| C2—N1—H1A  | 110.8      | C12—N6—H6A | 120.0      |
| C2—N1—H1B  | 110.8      | C12—N6—H6B | 120.0      |
| O1—C1—C2   | 116.4 (11) | N2—C6—N3   | 114.7(11)  |
| O2—C1—O1   | 123.1 (11) | O3—C6—N2   | 123.2 (12) |
| O2—C1—C2   | 120.4 (11) | O3—C6—N3   | 122.0 (11) |
| C5—N2—H2   | 119.8      | O4—C7—C8   | 116.5(11)  |
| C6—N2—H2   | 119.8      | O5—C7—O4   | 123.4 (11) |
| C6—N2—C5   | 120.4 (11) | O5—C7—C8   | 120.1 (11) |
| N1—C2—C1   | 106.3 (9)  | N4—C8—C7   | 110.4 (8)  |
| N1—C2—H2A  | 107.2      | N4—C8—H8   | 109.7      |

|            |            |               |            |
|------------|------------|---------------|------------|
| N1—C2—C3   | 113.9 (9)  | N4—C8—C9      | 110.4 (10) |
| C1—C2—H2A  | 107.2      | C7—C8—H8      | 109.7      |
| C1—C2—C3   | 114.7 (11) | C7—C8—C9      | 107.1 (10) |
| C3—C2—H2A  | 107.2      | C9—C8—H8      | 109.7      |
| H3A—N3—H3B | 137.8      | C8—C9—H9A     | 108.1      |
| C6—N3—H3A  | 110.6      | C8—C9—H9B     | 108.1      |
| C6—N3—H3B  | 110.6      | H9A—C9—H9B    | 107.3      |
| C2—C3—H3C  | 109.0      | C10—C9—C8     | 116.7(11)  |
| C2—C3—H3D  | 109.0      | C10—C9—H9A    | 108.1      |
| H3C—C3—H3D | 107.8      | C10—C9—H9B    | 108.1      |
| C4—C3—C2   | 112.7 (11) | C9—C10—H10A   | 108.3      |
| C4—C3—H3C  | 109.0      | C9—C10—H10B   | 108.3      |
| C4—C3—H3D  | 109.0      | H10A—C10—H10B | 107.4      |
| C7—O4—Cu1  | 115.1 (7)  | C11—C10—C9    | 116.1(11)  |
| Cu1—N4—H4A | 109.6      | C11—C10—H10A  | 108.3      |

|            |            |               |            |
|------------|------------|---------------|------------|
| Cu1—N4—H4B | 109.6      | C11—C10—H10B  | 108.3      |
| H4A—N4—H4B | 108.1      | N5—C11—C10    | 112.2 (12) |
| C8—N4—Cu1  | 110.2 (7)  | N5—C11—H11A   | 109.2      |
| C8—N4—H4A  | 109.6      | N5—C11—H11B   | 109.2      |
| C8—N4—H4B  | 109.6      | C10—C11—H11A  | 109.2      |
| C3—C4—H4C  | 109.6      | C10—C11—H11B  | 109.2      |
| C3—C4—H4D  | 109.6      | H11A—C11—H11B | 107.9      |
| C3—C4—C5   | 110.5 (11) | N5—C12—O6     | 119.8 (11) |
| H4C—C4—H4D | 108.1      | N6—C12—N5     | 120.3 (13) |
| C5—C4—H4C  | 109.6      | N6—C12—O6     | 119.8 (11) |

|              |             |                |             |
|--------------|-------------|----------------|-------------|
| Cu1—O1—C1—O2 | −173.9 (10) | C3—C4—C5—N2    | 176.5 (10)  |
| Cu1—O1—C1—C2 | 9.7 (13)    | O4—C7—C8—N4    | 9.5 (15)    |
| Cu1—N1—C2—C1 | 40.4 (11)   | O4—C7—C8—C9    | −110.6 (12) |
| Cu1—N1—C2—C3 | 167.7 (8)   | N4—C8—C9—C10   | 65.9 (14)   |
| Cu1—O4—C7—O5 | −177.0 (11) | O5—C7—C8—N4    | −170.2 (12) |
| Cu1—O4—C7—C8 | 3.3 (13)    | O5—C7—C8—C9    | 69.7 (15)   |
| Cu1—N4—C8—C7 | −17.1 (11)  | C5—N2—C6—O3    | 2.8 (19)    |
| Cu1—N4—C8—C9 | 101.1 (9)   | C5—N2—C6—N3    | −173.2 (10) |
| O1—C1—C2—N1  | −34.7 (14)  | C6—N2—C5—C4    | −170.3 (11) |
| O1—C1—C2—C3  | −161.5 (10) | C7—C8—C9—C10   | −173.9 (11) |
| N1—C2—C3—C4  | 63.0 (13)   | C8—C9—C10—C11  | 81.1 (16)   |
| C1—C2—C3—C4  | −174.3 (10) | C9—C10—C11—N5  | 174.0 (11)  |
| O2—C1—C2—N1  | 148.8 (11)  | C11—N5—C12—O6  | −2 (2)      |
| O2—C1—C2—C3  | 22.0 (16)   | C11—N5—C12—N6  | 179.4 (13)  |
| C2—C3—C4—C5  | 176.5 (10)  | C12—N5—C11—C10 | 176.6 (13)  |

----- Forwarded message -----

De: CCDC Deposit <[deposit\\_reply@ccdc.cam.ac.uk](mailto:deposit_reply@ccdc.cam.ac.uk)>

Date: jue, 12 may 2022 a las 19:29

Subject: CCDC Depository Request

To: Amalia Garcia Garcia <[amaliagarcia13@gmail.com](mailto:amaliagarcia13@gmail.com)>

Dear Depositor,

Thank you for depositing your crystal structure(s) via the joint CCDC/FIZ Karlsruhe deposition service.

The data have been assigned the following deposition numbers which can either be quoted as CCDC Numbers or CSD Numbers. A CCDC Number is usually quoted for an organic or metal-organic structure, whereas a CSD Number is usually quoted for an inorganic structure.

CCDC XXXXXXX-YYYYYYY (generally used for organic and metal-organic structures)

CSD XXXXXXX-YYYYYYY (generally used for inorganic structures)

Deposition Number 2172421

-----  
Summary of Data - Deposition Number 2172421  
-----

Compound Name:

Data Block Name: data\_cu\_citrulina

Unit Cell Parameters: a 5.1270(2) b 9.2086(4) c 17.1099(7) P21  
-----





---

The following ALERTS were generated. Each ALERT has the format

**test-name\_ALERT\_alert-type\_alert-level.**

Click on the hyperlinks for more details of the test.

---

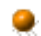

### Alert level B

PLAT341\_ALERT\_3\_B Low Bond Precision on C-C Bonds ..... 0.01663 Ang.

---

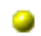

### Alert level C

PLAT018\_ALERT\_1\_C \_diffn\_measured\_fraction\_theta\_max .NE. \*\_full ! Check  
PLAT090\_ALERT\_3\_C Poor Data / Parameter Ratio (Zmax > 18) ..... 6.39 Note  
PLAT193\_ALERT\_1\_C Cell and Diffraction Temperatures Differ by .... 3 Degree  
PLAT911\_ALERT\_3\_C Missing FCF Refl Between Thmin & STh/L= 0.595 64 Report  
PLAT914\_ALERT\_3\_C No Bijvoet Pairs in FCF for Non-centro Structure Please Check

---

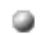

### Alert level G

PLAT004\_ALERT\_5\_G Polymeric Structure Found with Maximum Dimension 2 Info  
PLAT007\_ALERT\_5\_G Number of Unrefined Donor-H Atoms ..... 10 Report  
PLAT870\_ALERT\_4\_G ALERTS Related to Twinning Effects Suppressed .. ! Info  
PLAT883\_ALERT\_1\_G No Info/Value for \_atom\_sites\_solution\_primary . Please Do !  
PLAT909\_ALERT\_3\_G Percentage of I>2sig(I) Data at Theta(Max) Still 99% Note  
PLAT931\_ALERT\_5\_G CIFcalcFCF Twin Law ( 4 0-1) Est.d BASF 0.37 Check  
PLAT933\_ALERT\_2\_G Number of HKL-OMIT Records in Embedded .res File 1 Note  
PLAT941\_ALERT\_3\_G Average HKL Measurement Multiplicity ..... 1.0 Low

---

- 0 **ALERT level A** = Most likely a serious problem - resolve or explain  
1 **ALERT level B** = A potentially serious problem, consider carefully  
5 **ALERT level C** = Check. Ensure it is not caused by an omission or oversight  
8 **ALERT level G** = General information/check it is not something unexpected

- 3 ALERT type 1 CIF construction/syntax error, inconsistent or missing data  
1 ALERT type 2 Indicator that the structure model may be wrong or deficient  
6 ALERT type 3 Indicator that the structure quality may be low  
1 ALERT type 4 Improvement, methodology, query or suggestion  
3 ALERT type 5 Informative message, check
- 

## Validation response form

Please find below a validation response form (VRF) that can be filled in and pasted into your CIF.

```
# start Validation Reply Form
_vrf_PLAT341_Cu_citrulina
;
PROBLEM: Low Bond Precision on C-C Bonds ..... 0.01663 Ang.
RESPONSE: ...
;
# end Validation Reply Form
```

---

It is advisable to attempt to resolve as many as possible of the alerts in all categories. Often the minor alerts point to easily fixed oversights, errors and omissions in your CIF or refinement strategy, so attention to these fine details can be worthwhile. In order to resolve some of the more serious problems it may be necessary to carry out additional measurements or structure refinements. However, the purpose of your study may justify the reported deviations and the more serious of these should normally be commented upon in the discussion or experimental section of a paper or in the "special\_details" fields of the CIF. checkCIF was carefully designed to identify outliers and unusual parameters, but every test has its limitations and alerts that are not important in a particular case may appear. Conversely, the absence of alerts does not guarantee there are no aspects of the results needing attention. It is up to the individual to critically assess their own results and, if necessary, seek expert advice.

### **Publication of your CIF in IUCr journals**

A basic structural check has been run on your CIF. These basic checks will be run on all CIFs submitted for publication in IUCr journals (*Acta Crystallographica*, *Journal of Applied Crystallography*, *Journal of Synchrotron Radiation*); however, if you intend to submit to *Acta Crystallographica Section C* or *E* or *IUCrData*, you should make sure that full publication checks are run on the final version of your CIF prior to submission.

### **Publication of your CIF in other journals**

Please refer to the *Notes for Authors* of the relevant journal for any special instructions relating to CIF submission.

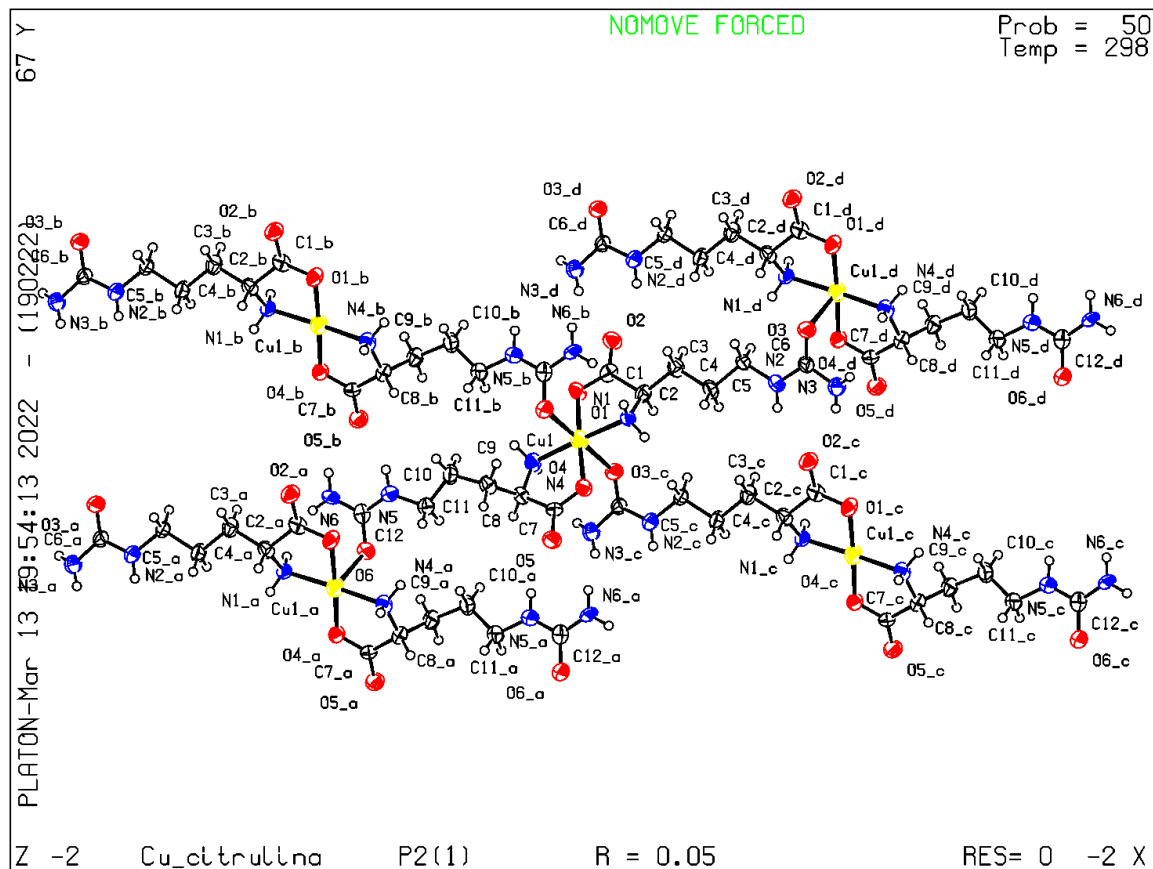

Supplement: s1 [file s1]
